# Supplementary material for: Opportunities and challenges of supervised machine learning for the classification of motor evoked potentials according to muscles
Source: PubMed Central journal article supplement (PMC10544622; doi:10.1186/s12911-023-02276-3), 2023-10-02
Supplement: 12911_2023_2276_MOESM1_ESM.pdf [file 12911_2023_2276_MOESM1_ESM.pdf]

## Supplementary material: Hyperparameter tuning

The parameters used with the *scikit-learn.model\_selection* function *GridSearchCV* were the following.

### RF:

`n_estimators = [200,500,1000],`

`min_samples_split = [2,16,64],`

`random_state = [42],`

`max_samples = [0.6,0.8],`

### kNN:

`n_neighbors = [1,3,5,7],`

`weights = ['uniform', 'distance'],`

`metric = ['cityblock', 'cosine', 'l1', 'l2']`

### LogReg:

`penalty = ['l1', 'l2', 'elasticnet'],`

`C = [0.1,0.5,1.0],`

`random_state = [42],`

`multi_class = ['auto', 'ovr', 'multinomial']`

The following were the ideal parameters determined by the gridsearch, depending on the algorithm, the type of data and the muscle comparison.

#### **RF\_Raw\_4**

```
{'RF__max_samples': 0.8, 'RF__min_samples_split': 2, 'RF__n_estimators': 500, 'RF__random_state': 42}
```

---

#### **RF\_Raw\_ext\_apb**

```
{'RF__max_samples': 0.8, 'RF__min_samples_split': 2, 'RF__n_estimators': 500, 'RF__random_state': 42}
```

---

#### **RF\_FE\_4**

```
{'RF__max_samples': 0.8, 'RF__min_samples_split': 2, 'RF__n_estimators': 200, 'RF__random_state': 42}
```

---

#### **RF\_PCA\_4**

```
{'RF__max_samples': 0.6, 'RF__min_samples_split': 2, 'RF__n_estimators': 1000, 'RF__random_state': 42}
```

---

#### **kNN\_Raw\_4**

```
{'kNN__metric': 'l1', 'kNN__n_neighbors': 1, 'kNN__weights': 'distance'}
```

---

#### **kNN\_FE\_4**

```
{'kNN__metric': 'l1', 'kNN__n_neighbors': 5, 'kNN__weights': 'distance'}
```

---

#### **kNN\_PCA\_4**

```
{'kNN__metric': 'cityblock', 'kNN__n_neighbors': 1, 'kNN__weights': 'distance'}
```

---

#### **LogReg\_Raw\_4**

```
{'LogReg__C': 1.0, 'LogReg__multi_class': 'auto', 'LogReg__penalty': 'l2', 'LogReg__random_state': 42}
```

---

#### **LogReg\_FE\_4**

```
{'LogReg__C': 1.0, 'LogReg__multi_class': 'multinomial', 'LogReg__penalty': 'l2',  
'LogReg__random_state': 42}
```

---

#### **LogReg\_PCA\_4**

```
{'LogReg__C': 1.0, 'LogReg__multi_class': 'ovr', 'LogReg__penalty': 'l2',  
'LogReg__random_state': 42}
```

---

#### **RF\_FE\_ext\_apb**

```
{'RF__max_samples': 0.8, 'RF__min_samples_split': 2, 'RF__n_estimators': 500,  
'RF__random_state': 42}
```

---

#### **RF\_PCA\_ext\_apb**

```
{'RF__max_samples': 0.8, 'RF__min_samples_split': 2, 'RF__n_estimators': 1000,  
'RF__random_state': 42}
```

---

#### **kNN\_Raw\_ext\_apb**

```
{'kNN__metric': 'cityblock', 'kNN__n_neighbors': 1, 'kNN__weights': 'uniform'}
```

---

#### **kNN\_FE\_ext\_apb**

```
{'kNN__metric': 'l1', 'kNN__n_neighbors': 7, 'kNN__weights': 'distance'}
```

---

#### **kNN\_PCA\_ext\_apb**

```
{'kNN__metric': 'cityblock', 'kNN__n_neighbors': 1, 'kNN__weights': 'uniform'}
```

---

#### **LogReg\_Raw\_ext\_apb**

```
{'LogReg__C': 1.0, 'LogReg__multi_class': 'multinomial', 'LogReg__penalty': 'l2',  
'LogReg__random_state': 42}
```

---

#### **LogReg\_FE\_ext\_apb**

```
{'LogReg__C': 1.0, 'LogReg__multi_class': 'multinomial', 'LogReg__penalty': 'l2',  
'LogReg__random_state': 42}
```

---

**LogReg\_PCA\_ext\_apb**

```
{'LogReg__C': 0.5, 'LogReg__multi_class': 'multinomial', 'LogReg__penalty': 'l2',  
'LogReg__random_state': 42}
```

---

**RF\_Raw\_ext\_ta**

```
{'RF__max_samples': 0.8, 'RF__min_samples_split': 2, 'RF__n_estimators': 1000,  
'RF__random_state': 42}
```

---

**RF\_FE\_ext\_ta**

```
{'RF__max_samples': 0.8, 'RF__min_samples_split': 2, 'RF__n_estimators': 500,  
'RF__random_state': 42}
```

---

**RF\_PCA\_ext\_ta**

```
{'RF__max_samples': 0.8, 'RF__min_samples_split': 2, 'RF__n_estimators': 1000,  
'RF__random_state': 42}
```

---

**kNN\_Raw\_ext\_ta**

```
{'kNN__metric': 'l1', 'kNN__n_neighbors': 1, 'kNN__weights': 'distance'}
```

---

**kNN\_FE\_ext\_ta**

```
{'kNN__metric': 'cityblock', 'kNN__n_neighbors': 3, 'kNN__weights': 'uniform'}
```

---

**kNN\_PCA\_ext\_ta**

```
{'kNN__metric': 'cosine', 'kNN__n_neighbors': 1, 'kNN__weights': 'distance'}
```

---

**LogReg\_Raw\_ext\_ta**

```
{'LogReg__C': 1.0, 'LogReg__multi_class': 'auto', 'LogReg__penalty': 'l2',  
'LogReg__random_state': 42}
```

---

### **LogReg\_FE\_ext\_ta**

```
{'LogReg__C': 1.0, 'LogReg__multi_class': 'multinomial', 'LogReg__penalty': 'l2',  
'LogReg__random_state': 42}
```

---

### **LogReg\_PCA\_ext\_ta**

```
{'LogReg__C': 0.1, 'LogReg__multi_class': 'auto', 'LogReg__penalty': 'l2',  
'LogReg__random_state': 42}
```
